# Supplementary material
Source: PubMed Central journal article supplement (PMC3607209)
Supplement: NIHMS447616-supplement-Supplementary_file_S1.pdf [file NIHMS447616-supplement-Supplementary_file_S1.pdf]

**Supplementary Table 1. The sequences of the primer used for real time RT-PCR**

| <b>Genes</b>  | <b>Forward sequences</b>      | <b>Reverse sequences</b>      |
|---------------|-------------------------------|-------------------------------|
| <i>BARD1</i>  | 5-CCATATTGCTTCTATTAAGGGCGAC-3 | 5-CCATGATTGCAAGCTTCATGCAATG-3 |
| <i>RAD54B</i> | 5-CCAGCCACTGACATTCAGGCAATG-3  | 5-ATGTCTTGGTGAGGTCGACAAC-3    |
| <i>PALB2</i>  | 5-ATACCTGGCACTTCGCAGAGGTTCC-3 | 5-AGAGGAACAAAACAATGCCCTGATC-3 |
| <i>EXO1</i>   | 5-CAATCCAGACACTGCTATGCCTGC-3  | 5-AAACAGTACCCGACTCTGGTCTGG-3  |
| <i>SIRT1</i>  | 5-GTAGCACTAATTCCAAGTTCATAC-3  | 5-AGTTTGGCATATTCACCACCTAAC-3  |
| <i>GAPDH</i>  | 5-CGGAGTCAACGGATTTGGTCGTAT-3  | 5-AGCCTTCTCCATGGTGGTGAAGAC-3  |
