# Supplementary material
Source: PubMed Central journal article supplement (PMC3607209)
Supplement: NIHMS447616-supplement-Supplementary_file_S3.pdf [file NIHMS447616-supplement-Supplementary_file_S3.pdf]

**Supplementary Table 3.** Selected genes related to DNA damage repair and response and affected by BMS

| Name    | Fold changed | p-value  | Signal Intensity |      | Description                                                                                          |
|---------|--------------|----------|------------------|------|------------------------------------------------------------------------------------------------------|
|         |              |          | Veh              | BMS  |                                                                                                      |
| GADD45A | 4.45         | 1.61E-03 | 300              | 1284 | Homo sapiens growth arrest and DNA-damage-inducible gene                                             |
| SFN     | 2.68         | 1.14E-02 | 1269             | 2759 | Homo sapiens stratifin (SFN)                                                                         |
| HIPK1   | 2.51         | 9.97E-04 | 159              | 372  | Homo sapiens homeodomain interacting protein kinase 1                                                |
| GADD45G | 2.25         | 1.39E-02 | 468              | 1019 | Homo sapiens growth arrest and DNA-damage-inducible gene                                             |
| *SIRT1  | -5.34        | 3.72E-03 | 2241             | 382  | Homo sapiens sirtuin (silent mating type information regulation 2 homolog) 1 (S. cerevisiae) (SIRT1) |
| DCLRE1B | -4.55        | 1.44E-03 | 1029             | 205  | Homo sapiens DNA cross-link repair 1B                                                                |
| RARA    | -3.83        | 8.90E-05 | 2969             | 699  | Homo sapiens retinoic acid receptor                                                                  |
| CDKN1B  | -3.33        | 1.55E-03 | 1240             | 339  | Homo sapiens cyclin-dependent kinase inhibitor 1B (p27)                                              |
| DYRK2   | -3.19        | 1.08E-02 | 1221             | 353  | Homo sapiens dual-specificity tyrosine-(Y)-phosphorylation regulated kinase 2 (DYRK2)                |
| BCL6    | -3.16        | 1.70E-02 | 1190             | 340  | Homo sapiens B-cell CLL/lymphoma 6 (zinc finger protein 51)                                          |
| FBXO45  | -3.03        | 5.04E-03 | 1074             | 321  | Homo sapiens F-box protein 45 (FBXO45)                                                               |
| ALKBH1  | -3.00        | 6.79E-04 | 1170             | 353  | Homo sapiens alkB                                                                                    |
| ASF1A   | -2.99        | 1.44E-02 | 1122             | 334  | Homo sapiens ASF1 anti-silencing function 1 homolog A (S. cerevisiae) (ASF1A)                        |
| *PALB2  | -2.63        | 2.04E-02 | 810              | 281  | Homo sapiens partner and localizer of BRCA2 (PALB2)                                                  |
| *EXO1   | -2.51        | 3.15E-04 | 1373             | 493  | Homo sapiens exonuclease 1 (EXO1)                                                                    |
| POLG2   | -2.50        | 1.18E-05 | 1283             | 460  | Homo sapiens polymerase (DNA directed)                                                               |
| *RAD54B | -2.50        | 7.82E-04 | 1303             | 471  | Homo sapiens RAD54 homolog B (S. cerevisiae) (RAD54B)                                                |
| NIPBL   | -2.43        | 4.36E-04 | 878              | 325  | Homo sapiens Nipped-B homolog (Drosophila) (NIPBL)                                                   |
| SETMAR  | -2.39        | 1.97E-02 | 1715             | 655  | Homo sapiens SET domain and mariner transposase fusion gene (SETMAR)                                 |
| BCL3    | -2.37        | 3.59E-03 | 1327             | 493  | Homo sapiens B-cell CLL/lymphoma 3 (BCL3)                                                            |
| RNF168  | -2.36        | 1.44E-03 | 958              | 362  | Homo sapiens E3 ubiquitin-protein ligase RNF 168                                                     |
| REV1    | -2.30        | 1.33E-02 | 1896             | 760  | Homo sapiens REV1 homolog (S. cerevisiae) (REV1)                                                     |
| SMAD3   | -2.29        | 3.51E-04 | 1006             | 397  | Homo sapiens SMAD family member 3 (SMAD3)                                                            |
| HINFP   | -2.25        | 3.08E-03 | 694              | 276  | Homo sapiens histone H4 transcription factor (HINFP)                                                 |
| BCL2    | -2.23        | 1.29E-02 | 1048             | 401  | Homo sapiens B-cell CLL/lymphoma 2 (BCL2)                                                            |
| XPC     | -2.16        | 1.91E-03 | 1754             | 735  | Homo sapiens xeroderma pigmentosum                                                                   |
| DCLRE1A | -2.10        | 1.11E-02 | 794              | 343  | Homo sapiens DNA cross-link repair 1A                                                                |
| *BARD   | -2.10        | 1.60E-03 | 1766             | 763  | Homo sapiens BRCA1 associated RING domain 1 (BARD1)                                                  |
| TDP1    | -2.09        | 4.80E-03 | 534              | 235  | Homo sapiens tyrosyl-DNA phosphodiesterase 1 (TDP1)                                                  |

|        |       |          |      |      |                                                                                        |
|--------|-------|----------|------|------|----------------------------------------------------------------------------------------|
| OBFC2A | -2.07 | 1.50E-02 | 868  | 376  | Homo sapiens oligonucleotide/oligosaccharide-binding fold containing 2A (OBFC2A)       |
| PAXIP1 | -2.04 | 1.37E-03 | 2520 | 1128 | Homo sapiens PAX interacting (with transcription-activation domain) protein 1 (PAXIP1) |
| ABL1   | -2.02 | 2.72E-03 | 1505 | 693  | Homo sapiens c-abl oncogene 1                                                          |

---

\* Genes are involved in HR
